# Supplementary material
Source: publisher site journal article supplement (https://www.degruyter.com/publication/journal_key/BIOL/downloadAsset/BIOL_EACR%20Early%20Career%20Researchers%20Conference%202023.pdf)
Supplement: Supplementary file 1 [file BIOL_EACR%20Early%20Career%20Researchers%20Conference%202023.pdf]

# EARLY CAREER RESEARCHERS' CONFERENCE

European Association  
for Cancer Research

**VIRTUAL EVENT**  
**27 - 28 June 2023**

## **Short description:**

This highly interactive, workshop-style online conference will cover a broad range of topics, particularly focusing on the personal experiences of our invited speakers and their practical advice on the career-related questions early-career researchers have told us they have. Topics include mental health, gender in research, successful paper-writing, and tips for securing funding, network building, and finding your career path. This is the third edition of this conference and there will be plenty of chances to turn on your camera and mic to speak directly with the experts.

The target audience for this conference is scientists in the early phase of their career who want to develop a career in cancer research. The programme is tailored for scientists in the process of starting their independent path, as well as for researchers engaging with the clinical and industrial applications of their work.

## **Speakers:**

Arianna Baggiolini (Institute of Oncology Research, Switzerland), Maria Caffarel (Biodonostia, Spain), Arkaltz Carracedo (CIC bioGUNE, Spain), Sankari Nagarajan (University of Manchester, UK), Elisa Oricchio (EPFL, Switzerland)

## **Keywords:**

early career research, basic cancer research career, translational cancer research career, clinical cancer research, industrial cancer research cancer research, career advice, oncology

**Conference website: [click here](#)**

Contact Person: Hannah Barrs <[hannah.barrs@eacr.org](mailto:hannah.barrs@eacr.org)>

**REGISTRATION  
DEADLINE:**

**29 MAY 2023**

**EACR**

European Association  
for Cancer Research

**PROMOTIONAL PARTNER:**

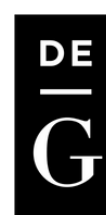

**DE GRUYTER**

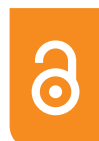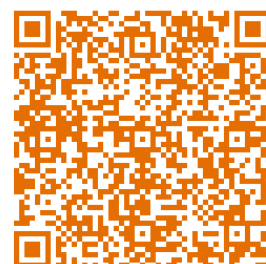

**REGISTER HERE**

# EARLY CAREER RESEARCHERS' CONFERENCE

European Association  
for Cancer Research

VIRTUAL EVENT  
27 - 28 June 2023

As a promotional partner of this meeting, De Gruyter's Open Access journal, Open Life Sciences, offers all participants a 30% discount for Article Processing Charges, for all manuscripts submitted before September 31st, 2023.

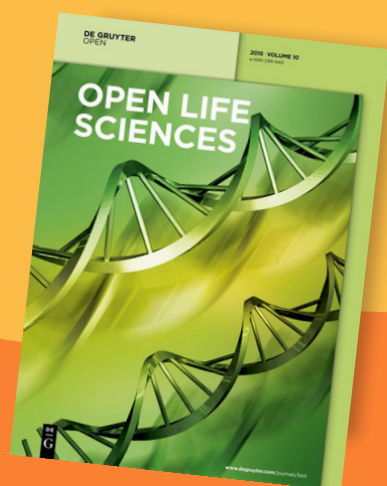

## How to submit

Authors are kindly invited to submit their contribution via online submission system Editorial Manager available at:

<https://www.editorialmanager.com/openbiol/default1.aspx>

SUBMISSION  
DEADLINE:

31/09/2023

Please remember to select: SI: EARLY CAREER RESEARCHERS' CONFERENCE EACR 2023 to ensure that your manuscript is processed with the highest priority and that discount is applied.

PROMOTIONAL PARTNER

EACR

European Association  
for Cancer Research

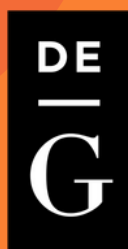

DE GRUYTER

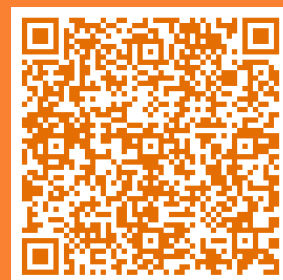

REGISTER HERE
